# Prevalence of SARS-CoV-2 and co-occurrence/co-infection with malaria during the first wave of the pandemic (the Burkina Faso case)

1 **Diana López-Farfán<sup>1</sup>, R. Serge Yerbanga<sup>2</sup>, Marina Parres-Mercader<sup>1</sup>, Manuela Torres-Puente<sup>3</sup>,**  
2 **Inmaculada Gómez-Navarro<sup>3</sup>, Do Malick Soufiane Sanou<sup>2</sup>, Adama Franck Yao<sup>2</sup>, Jean Bosco**  
3 **Ouédraogo<sup>2</sup>, Iñaki Comas<sup>3,4</sup>, Nerea Irigoyen<sup>4</sup>, Elena Gómez-Díaz<sup>1\*</sup>**

4 <sup>1</sup>Instituto de Parasitología y Biomedicina López-Neyra, Consejo Superior de Investigaciones  
5 Científicas (IPBLN-CSIC), Granada, Spain.

6 <sup>2</sup>Institut de Recherche en Sciences de la Santé, Bobo-Dioulasso, Burkina Faso.

7 <sup>3</sup>Institute of Biomedicine of Valencia (IBV-CSIC), Valencia, Spain.

8 <sup>4</sup>CIBER in Epidemiology and Public Health, Madrid, Spain

9 <sup>5</sup>Division of Virology, Department of Pathology, University of Cambridge, Cambridge, UK

10 **\* Correspondence:**

11 Elena Gómez-Díaz

12 elena.gomez@csic.es

13 **Keywords: SARS-CoV-2, co-infection, malaria, Western Africa, Seroprevalence, genomic**  
14 **surveillance. (Min.5-Max. 8)**

15 Number of words: 4.335

16 Number of figures: 2

17 Number of tables: 2

## 18 **Abstract**

19 Africa accounts for 1.5% of the global coronavirus disease 2019 (COVID-19) cases and 2.7% of deaths,  
20 but this low incidence has been partly attributed to the limited testing capacity in most countries. In  
21 addition, the population in many African countries is at high risk of infection with endemic infectious  
22 diseases such as malaria. Our aim is to determine the prevalence and circulation of SARS-CoV-2  
23 variants, and the frequency of co-infection with the malaria parasite. We conducted serological tests  
24 and microscopy examinations on 998 volunteers of different ages and sexes in a random and stratified  
25 population sample in Burkina-Faso. In addition, nasopharyngeal samples were taken for RT-qPCR of  
26 SARS-COV-2 and for whole viral genome sequencing. Our results show a 3.2% and a 2.5% of SARS-  
27 CoV-2 seroprevalence and PCR positivity; and 22% of malaria incidence, over the sampling period,  
28 with marked differences linked to age. Importantly, we found 2 cases of confirmed co-infection and 8  
29 cases of suspected co-infection mostly in children. Finally, we report the genome sequences of 13  
30 SARS-CoV-2 isolates circulating in Burkina Faso at the time of analysis, assigned to lineages A.19,  
31 A.21, B.1.1.404, B.1.1.118, B.1 and grouped into clades; 19B, 20A and 20B. This is the first  
32 population-based study about SARS-CoV-2 and malaria in Burkina Faso during the first wave of the  
33 pandemic, providing a relevant estimation of the real prevalence of SARS-CoV-2 and variants  
34 circulating in this Sub-Saharan African country. Besides, it highlights the low frequency of co-infection  
35 with malaria in African communities.

## 36 **1 Introduction**

37 To date, the SARS-CoV-2 coronavirus, responsible of the coronavirus disease 19 (COVID-19), has  
38 caused more than 606 million cases and 6,5 million deaths worldwide, a small proportion of these (9,3  
39 million cases [1.5%] and around 174,407 deaths [2.7%]) have occurred in Africa (data as of September  
40 13th 2022, WHO<sup>1</sup>). Despite their under-funded health systems, cases and deaths reported in Africa  
41 appear low compared to other parts of the world. In addition, most of cases cluster in few Northern and  
42 Southern countries (i.e. South Africa [4,01M cases], Morocco [1,26M cases] and Tunisia [1,14M  
43 cases]), while data in most Western African countries is scarce or absent (i.e. the number of  
44 accumulative cases considering all countries in Western Africa is ~936K). However, these estimations  
45 should be considered with caution given the low number of tests conducted in most African countries  
46 compared to data available for Europe (one or two orders of magnitude higher). A more proper effort  
47 to estimate the real incidence is needed to make conclusions about the extent of this pandemic in the  
48 African continent.

49 To prevent the emergence and spread of new variants across the world, sequencing of SARS-CoV-2  
50 lineages circulating in Africa is critical (1). Indeed, the higher rates of COVID-19 testing and genomic  
51 surveillance in the south of the continent have permitted the early identification of several variants of  
52 concern (VOC) such as Beta (B.1.351) and Omicron (B.1.1.529); and different variants of interest  
53 (VOI) such as C.1.1 (2,3). To date, most of the deposited sequences from Africa in the GISAID  
54 database come from the South African region (47%), while sequences from Western African countries  
55 only account for 17.6% (GISAID<sup>2</sup> as of 31 May 2022) (4). Such an uneven African genomic  
56 surveillance holds a weakness in our global surveillance system and raises the concern of not leaving  
57 Africa behind in the global pandemic response (1).

58 Besides the direct effects of COVID-19 in terms of cases and deaths, the pandemic has shown to have  
59 important collateral effects on several other infectious diseases such as HIV/AIDS, tuberculosis and  
60 malaria (5). According to the World Health Organization (WHO), half of all deaths in Africa are caused  
61 by these three infectious diseases (~2.4 million people/year) compared to only 2% in Europe. The Sub-  
62 Saharan Africa is one of the most affected regions with significant drops in notifications of all three  
63 diseases. According to the latest WHO World malaria report<sup>3</sup>, 15 malaria endemic countries reported  
64 more than 20% reduction in malaria testing and treatment between April and June of 2020<sup>3</sup>.

65 Malaria is a life-threatening disease caused by unicellular eukaryotic parasites of the genus  
66 Plasmodium that are transmitted to humans through the bites of infected female Anopheles mosquitoes.  
67 Sub-Saharan Africa carries a disproportionate portion of the global malaria burden. In 2020, the region  
68 was home to 95% of malaria cases and deaths. Children below 5 years are the most vulnerable group  
69 affected by malaria; accounting for 80% of all malaria deaths in the region<sup>3</sup>. At the beginning of the  
70 COVID-19 pandemic, studies projected that malaria deaths could double in 2020 due to health service  
71 disruptions (6). However, many countries took urgent actions to avoid the worst projections. In 2020,  
72 there were an estimated 241 million cases of malaria and 627,000 deaths worldwide, this is 14 million  
73 more cases and 69,000 more deaths than in 2019. Two-thirds of this increase have been associated to  
74 disruption in malaria prevention campaigns, diagnosis and treatment during the first wave of the  
75 pandemic<sup>3</sup>.

---

<sup>1</sup> <https://covid19.who.int/>

<sup>2</sup> <https://gisaid.org/submission-tracker-global/>

<sup>3</sup> <https://www.who.int/teams/global-malaria-programme/reports/world-malaria-report-2021>

76 Burkina Faso is a Western African country that confirmed its first community transmission cases of  
77 SARS-CoV-2 on March 15, 2020. To date, this country has reported 21,128 total cases which is a very  
78 low incidence compared with the 4M of total cases reported from South Africa, for example. Whether  
79 this rate is representative of the real epidemiological situation of the country, or if it is due to  
80 insufficient testing, remains and it will probably remain unanswered. On the other hand, malaria that  
81 is endemic across the country, is a major health issue with a seasonal peak from June to October.  
82 During the COVID-19 pandemic, malaria case incidence (cases per 1000 population at risk) increased  
83 from 366.1 in 2019 to 389.9 in 2020<sup>4</sup>. The high malaria incidence in this country and the increase in  
84 prevalence detected during the first wave of the COVID-19 pandemic raised the question about how  
85 frequent has been SARS-CoV-2 and malaria co-infection.

86 In order to address this, 998 volunteers from different rural and urban areas in the south of Burkina  
87 Faso were screened for malaria by microscopy, and for SARS-CoV-2 using rapid diagnostic serology  
88 tests and RT-qPCR. In addition, PCR positive samples were whole-genome sequenced and analyzed  
89 through comparative genomics and phylogenetics. We found a 3.2% seroprevalence and 2.5% of PCR  
90 positivity for SARS-CoV-2 over the studied period. Although age groups mostly affected by each  
91 disease do not overlap, 10 cases of SARS-CoV-2/malaria co-infection in younger age groups were  
92 found. Finally, we reported 13 SARS-CoV-2 whole genomes circulating in Burkina Faso at the time  
93 of sampling. Viral genomes clustered into 3 early clades (i.e. 19B, 20A and 20B) and lineages found  
94 were A.19, A.21, B.1.1.404, B.1.1.118 and B.1.

95 Altogether, our data shed new light on the incidence of COVID-19 and the different SARS-CoV-2  
96 circulating variants in a Western African country, and its co-occurrence with another endemic  
97 infectious disease of utter importance such as malaria.

## 98 **2 Methods**

### 99 **Ethics**

100 This protocol was carried out by the Institut des Sciences et Techniques de Bobo-Dioulasso and was  
101 approved by the Spanish National Research Council (CSIC), the Ethics Committee of Biomedical  
102 Research in Andalusia (CCEIBA), and the Centre National de la Recherche Scientifique et  
103 Technologique (CNRST) of Burkina-Faso. The protocol is in conformity with the declaration of  
104 Helsinki and all international regulations about the ethical principles in biomedical research involving  
105 human subjects. SARS-CoV-2 seropositive and malaria positive individuals were provided with  
106 treatment and assisted by medical professionals. During the screening, local authorities, school  
107 directors and families of volunteers were informed about the objectives of the study and protocols  
108 performed. As the study involved children, a signed declaration of conformity for the participation in  
109 the study was obtained from their parents and/or legal representatives.

### 110 **Study design**

111 The study was conducted in 11 villages from different rural and urban areas in the south of Burkina  
112 Faso (**Supplementary Figure 1**). From August to November 2020, a total of 998 asymptomatic  
113 volunteers were enrolled. Demographic and clinical information collected included age, sex and  
114 temperature. For each participating subject, two drops of blood were obtained by capillary puncture of  
115 the fingertip. This blood was used for malaria detection by microscopy, and for COVID-19 serology

---

<sup>4</sup> <https://data.worldbank.org/indicator/SH.MLR.INCD.P3?locations=BF>, accessed on 27 April 2022

116 testing using a point of care rapid test (INgezim COVID-19 CROM Easy). When there was consent,  
117 nasopharyngeal samples were also collected in AVL buffer (Qiagen) for molecular testing of SARS-  
118 CoV-2 using RT-qPCR.

### 119 **SARS-CoV-2 diagnosis**

120 Detection of anti-SARS-CoV-2 antibodies was performed on volunteers' capillary blood using the  
121 INgezim COVID-19 CROM Easy kit (Gold Standard Diagnostics), following manufacturer's  
122 instructions. This serology-based finger-prick test is based on a dual-recognition  
123 immunochromatographic assay that determines the presence of total antibodies (IgG, IgA, and IgM)  
124 specific to SARS-CoV-2 in a single blood sample by using the nucleoprotein (N protein) as antigen.  
125 The manufacturer reported specificity of 99.3% and sensitivity of 94.5%. No cross-reactivity with other  
126 coronaviruses or agents related to human respiratory illnesses have been reported. In this study, we  
127 estimated seroprevalence as the proportion of individuals who had a positive result in the point-of-care  
128 test after 10 minutes.

129 Nasopharyngeal samples were taken using a sterile swab. The swab was immediately placed in a pre-  
130 filled tube containing 0.5 mL of inactivating lysis buffer (AVL, Qiagen). Samples were stored at 4°C  
131 for 24h and at -20°C for prolonged storage for subsequent analysis. Molecular detection of SARS-  
132 CoV-2 by RT-qPCR on seropositive volunteers was carried out in the Institut de Recherche en Sciences  
133 de la Santé/ Direction Régionale de l'Ouest (IRSS DRO) of Burkina Faso using the FastPlexTriplex  
134 SARS-CoV-2 detection kit (gene target identified: ORF1ab, N and the human RNase P as control)  
135 (PreciGenome, LLC).

136 Swab samples of seronegative volunteers were stored at -80°C and processed in the Institute of  
137 Parasitology and Biomedicine Lopez-Neyra (IPBLN) as follows: RNA was extracted from 140 µL of  
138 pooled swab samples using the QIAamp viral RNA extraction kit (Qiagen). A pool size of five samples  
139 was used in the villages with seropositive subjects (Bobo-Dioulasso and Dandé), whereas samples from  
140 villages with negative seroprevalence were processed in pools of 10 samples. RT-qPCR analysis was  
141 performed using the one step Direct SARS-CoV-2 Realtime PCR Kit (Vircell S.L) following the  
142 manufacturer's instructions. Targets identified with this kit are N, E and hRNase P genes. RT-qPCR  
143 was performed in 20 µL final volume reactions (5 µL of RNA sample) using a CFX96 Real-Time PCR  
144 Detection System (Bio-Rad, Hercules, CA, USA). Cycle threshold (Ct) values were analyzed using the  
145 BIORAD CFX manager software. Samples of positive pools were extracted individually and retested  
146 by RT-qPCR. Samples were considered positive when the N and E target genes had a Ct < 40. Positive  
147 and negative controls were included in all experiments.

### 148 **Whole Genome Sequencing and Phylogenetic Analysis**

149 RNA from SARS-CoV-2 positive samples with a Ct value  $\leq 35$  was sent to sequencing to the Institute  
150 of Biomedicine of Valencia (IBV-CSIC). RNA was retrotranscribed into cDNA and SARS-CoV-2  
151 complete genome amplification was performed in two multiplex PCR, accordingly to openly available  
152 protocol developed by the ARTIC network<sup>5</sup> using the V4.1 multiplex primers scheme (artic-network  
153 n.d.). Two resulting amplicon pools were combined and used for library preparation. Genomic libraries  
154 were constructed with the Nextera DNA Flex Sample Preparation kit (Illumina Inc., San Diego, CA)  
155 according to the manufacturer's protocol with 5 cycles for indexing PCR. Whole genome sequencing  
156 was carried out in a MiSeq platform (2×150 cycles paired-end run; Illumina). Sequences obtained went

---

<sup>5</sup> [https://www.protocols.io/view/ncov-2019-sequencing-protocol-bp2l6n26rgqe/v1?version\\_warning=no](https://www.protocols.io/view/ncov-2019-sequencing-protocol-bp2l6n26rgqe/v1?version_warning=no)

157 through an open source bioinformatic pipeline based on IVAR<sup>6</sup> (7). The different steps of the pipeline  
158 are as follows: 1) removal of human reads with Kraken (8); 2) filtering of the fastq files using fastp v  
159 0.20.1 (9) (arguments: --cut tail, --cut-window-size, --cut-mean-quality, -max\_len1, -max\_len2); 3)  
160 mapping and variant calling using IVAR v 1.2; and 4) quality control assessment with MultiQC (10).  
161 Consensus sequences generated by this pipeline were aligned against the SARS-CoV-2 reference  
162 sequence (11) with MAFFT (12). Problematic positions were masked using the mask\_alignment.py  
163 script from the repository maintained by Rob Lanfear<sup>7</sup>. Lineages and clade nomenclature were assigned  
164 using Pangolin (13) and Nexclade online tool (14). Phylogenetic tree was generated with Nextclade  
165 v2.5.0<sup>8</sup>, the tree was downloaded in JSON format and visualized using Auspice v2.37.3 online tool<sup>9</sup>  
166 (15,16).

## 167 **Malaria diagnosis**

168 Malaria prevalence was estimated in the same population sample of 998 volunteers simultaneously to  
169 SARS-CoV-2 detection. Detection of malaria was performed by microscopic examination of blood  
170 thick smears that were prepared following standard methods (17). Thick smears were screened for the  
171 presence of *Plasmodium falciparum* asexual and gametocyte stages in the blood.

## 172 **Statistical analysis**

173 We tested the association between variables with the Wilcoxon Sum Rank tests (for continuous  
174 quantitative variables) and the Kruskal-Wallis chi-squared test.

## 175 **3 Results and Discussion**

176 COVID-19 transmission in Africa has been marked by relatively fewer infections, mostly  
177 asymptomatic, and lower death rate compared to developed countries. A younger population structure  
178 and a variety of socio-ecological factors (i.e. warm weather, low population density and mobility and  
179 trained immunity by previous high burden infectious diseases), as well as early public health measures  
180 taken by governments (i.e. early lockdown sub-Saharan countries) (18), have been suggested to explain  
181 such lower incidence (19). Surprisingly, the pandemic has been more pronounced in a few countries  
182 (e.g. South Africa, Morocco and Tunisia) suggesting country-specific drivers of SARS-CoV-2 spread  
183 and morbidity, but this could also be largely explained by a low and unequal testing capacity. Reported  
184 cases of COVID-19 are dissimilar between countries like South Africa (4,01 million cases and 102,129  
185 deaths), Kenia (338,301 cases and 5,674 deaths) or Ethiopia (493,353 cases and 7,572 deaths). Testing  
186 also differs greatly, with 50,000 tests/day in South Africa versus 5,000 tests/day in Kenia or Ethiopia.  
187 In Burkina Faso, with a population of 20,903,278, only 21,128 cases and 387 deaths have been reported  
188 (as of September 13th 2022, WHO<sup>1</sup>). However, no data about the testing effort in Burkina Faso are  
189 available for comparison.

190 At the beginning of the pandemic, serological surveillance was used as a prospective tool to define the  
191 cumulative incidence of COVID-19, particularly in the presence of asymptomatic or mild infections  
192 (20). At present, seven countries in Western Africa, four countries in Eastern Africa and four countries

---

<sup>6</sup> <https://gitlab.com/fisabio-ngs/sars-cov2-mapping>

<sup>7</sup> <https://zenodo.org/record/4069557#.X37nuXUzaWg>

<sup>8</sup> <https://clades.nextstrain.org> (accessed on 13 September 2022)

<sup>9</sup> <https://auspice.us/>

193 in Central Africa have conducted seroprevalence studies that are published or available as preprint  
194 (**Supplementary Table 1**). Serological surveys in African countries show highly heterogeneous results  
195 with SARS-CoV-2 seroprevalence ranging from 0.9% to 45% during 2020 (**Supplementary Table 1**).  
196 To our knowledge, no data have been reported from Burkina Faso for any period.

197 In this study, we report the results of a population-based and stratified survey involving a total of 998  
198 volunteers that were recruited during a period of 3 months in 2020 (August 22nd to November 19th).  
199 The sampling was conducted in 11 villages from different rural and urban areas in the south of Burkina  
200 Faso (**Supplementary Figure 1**). 55% of the participants (549 out of 998) were female, and 45% (449  
201 out of 998) were male. The samples were distributed equally into four age groups: (A) 5-12 years  
202 (25.2%); (B) 13-20 years (24.9%); (C) 21-40 years (25.2%); and (D) >40 years (24.7%). Importantly,  
203 all the participants were asymptomatic. The distribution of positive cases by age and gender classes is  
204 detailed in **Table 1**.

205 A total of 32 individuals out of 998 tested positive for SARS-CoV-2 total antibodies (IgG/A/M),  
206 resulting in an overall seroprevalence rate of 3.2% (95% CI 2.1–4.3). However, most of seropositives  
207 came from the urban city of Bobo-Dioulasso where local seroprevalence was of 4.96% at that time. A  
208 higher seroprevalence in urban areas in Africa has been reported previously (21–24). Apart from urban  
209 vs. rural differences, we report significant differences between age groups in SARS-CoV-2  
210 seropositivity (Kruskal-Wallis chi-squared=16.285, df=3, p-value < 0.001). The highest  
211 seroprevalence was in the group age of >40 years (6.9% [95% CI 3.7–10.1]), followed by teenagers  
212 aged 13-20 years (2.8% [95% CI 0.7–4.9]) and children aged 5–12 years (2.4% [95% CI 0.5–4.3]),  
213 whereas the lowest seroprevalence was observed in the group of 21-40 years (0.8% [95% CI 0–1.9]).  
214 (**Figure 1A, Table 1**). However, there were no significant differences in SARS-CoV-2 seroprevalence  
215 between female and male individuals (Wilcoxon rank sum test  $W = 15690$ , p-value = 0.78)  
216 (**Supplementary Figure 2**), which agrees with other population-wide seroprevalence surveys in Sub-  
217 Saharan Africa (22,25,26). Finally, we also observed that SARS-CoV-2 seroprevalence varied  
218 markedly with time with a significant increase in the incidence with a maximum of ~5.5% in November  
219 2020 (**Supplementary Figure 3**). This increase in infection rate agrees with previously published  
220 reports from the African CDC and WHO<sup>1</sup> that observed a gradually increase in cases since September  
221 2020.

222 Furthermore, seroprevalence estimates for SARS-CoV-2 obtained in this study are also comparable  
223 with results reported in other African countries during 2020 (although sample period and the testing  
224 effort might be different) (**Supplementary Table 1**). For example, in a serosurvey of asymptomatic  
225 people conducted in May 2020 in Addis Ababa (Ethiopia), 3.0% tested positive for SARS-CoV-2 IgG  
226 (27). Similarly, a seroprevalence study of 3,098 Kenyan blood donors sampled between April-June  
227 2020 reported a national seroprevalence of 4.3%, with some urban regions reaching around 8% (e.g.  
228 Nairobi and Mombasa) (21). Another study in Ethiopia during July 2020 in 14 urban areas found a  
229 seroprevalence of 3.5% from 16,932 samples (22).

230 The 32 SARS-CoV-2 seropositive individuals were subjected to RT-qPCR. SARS-CoV-2 active  
231 infection was confirmed in 7 samples (seropositive/PCR positive). Due to the low sensitivity of rapid  
232 antibody tests to detect early infections, all the seronegative samples were also analyzed by RT-qPCR.  
233 Swab samples were first processed in pools, and then, positive pools were processed individually.  
234 Pooled testing is a useful approach to reduce time, cost and increase testing capacity in areas with low  
235 prevalence of COVID-19. This PCR pooling works with maximum efficiency with a prevalence <3%  
236 and a pool size <10 (28,29). First, we tested the sensitivity of our ‘pool-test’ in groups of five (one  
237 positive sample diluted in four negative ones) and ten (one positive sample diluted in nine negative

238 ones) samples (**Supplementary Table 2**). With these results, we decided to group samples in pools of  
239 five in areas with seropositive subjects (i.e. Bobo-Dioulasso and Dandé); whereas samples from areas  
240 with zero seroprevalence, pools of 10 swabs were processed instead. RNA was extracted from pooled  
241 swab samples and RT-PCR was performed. Then, samples in positive pools were extracted and tested  
242 individually. With this procedure, we found 17 additional SARS-CoV-2 positive samples by RT-qPCR,  
243 most of them from the urban locality of Bobo-Dioulasso (**Table 1, Figure 1B**). In concordance with  
244 serological tests, there were not significant differences in SARS-CoV-2 PCR positivity between  
245 females and males (Wilcoxon rank sum test  $W = 125348$ ,  $p$ -value = 0.08114) (**Supplementary Figure**  
246 **2**). However, there were significant differences between age groups (Kruskal-Wallis chi-squared =  
247 20.155,  $df = 3$ ,  $p$ -value < 0.001) with the highest prevalence in the age group of >40 years decreasing  
248 with age. The lowest prevalence was observed in children between 5–12 years (**Figure 1A, Table 1**).

249 19 out of 24 SARS-CoV-2 PCR positive samples had a Ct value  $\leq 35$  and they were processed for  
250 whole-genome sequencing. After genome assembly and quality control processes, good quality  
251 genomes were obtained from 13 samples. To assign the sequences to lineages and clades, we used the  
252 dynamic lineage classification method called Phylogenetic Assignment of Named Global Outbreak  
253 Lineages (PANGOLIN) (13) and the sequence analysis web tool, Nextclade (14). Phylogenetic  
254 analysis showed that our SARS-CoV-2 genomes clustered into three clades: 19B, 20A and 20B (**Table**  
255 **2, Figure 2**). Most of the samples belong to clade 19B, this one along with 19A were the clades that  
256 emerged in Wuhan in late 2019 and dominated the early outbreak. Clade 20A emerged from 19A and  
257 dominated the European outbreak in March 2020, and 20B is a sub-clade of 20A (30). Lineages found  
258 were A.19, A.21, B.1.1.404, B.1.1.118 and B.1. The distribution and description of these lineages<sup>10</sup> are  
259 summarized in **Supplementary Table 3**. Lineages A.19, A.21 and B.1.1.404 were common in Burkina  
260 Faso at the time of analysis, and importantly, were described there for the first time<sup>10</sup>. However,  
261 lineages B.1.1.118 and B.1 were not common in Burkina Faso nor even in Africa at that time<sup>10</sup>. As  
262 these lineages presented a worldwide distribution, they probably correspond to imported lineages.  
263 Indeed, B.1 was reported in Morocco, Saudi Arabia, Spain, France and Brazil on February 2020<sup>11</sup>. A  
264 genomic study of SARS-CoV-2 conducted in Ghana with samples from March 12 to April 1 2020 and  
265 the end of May 2020, reports the same clades that we found circulating in Burkina Faso from August  
266 to November 2020, moreover they also report the lineage B.1 (31). Although little divergence was  
267 observed (**Figure 2**) as sequences comes from early days in the pandemic, we detected a common spike  
268 mutation in most of the Burkina Faso genomes, D614G mutation (**Table 2**). A SARS-CoV-2 variant  
269 carrying this mutation became dominant during the early days of the pandemic at global level and had  
270 a presumed fitness advantage (32). The D614G mutation was also dominant in Guinea genomes (31)  
271 and north-middle African genomes (33).

272 In order to estimate the frequency of SARS-CoV-2/malaria co-infection for the same period and  
273 subjects, malaria was screened by microscopy. 219 individuals out of 998 tested positive for malaria  
274 (22% CI 19.4–24.5). Like in the case of SARS-CoV-2, there were significant differences in malaria  
275 prevalence between age groups (Kruskal-Wallis chi-squared = 132.18,  $df = 3$ ,  $p$ -value < 0.001), but in  
276 this case, malaria was mostly detected in children below 12 years old (42.2%; 95% CI 36.1–48.4)  
277 (**Figure 1; Table 1**). In addition, a small sex difference was observed with a higher prevalence in male  
278 subjects ( $W = 92508$ ,  $p$ -value < 0.05) (**Supplementary Figure 2**). Similar to the temporal trend  
279 observed for SARS-CoV-2, malaria cases also showed a significant increase from 5.26% at the  
280 beginning of the study to 29.2% at the end of the sampled period (**Supplementary Figure 3**). This

<sup>10</sup> [https://cov-lineages.org/lineage\\_list.html](https://cov-lineages.org/lineage_list.html)

<sup>11</sup> <https://gisaid.org/phylogenetics/global/nextstrain/>

281 could suggest an impact in malaria control due to the pandemic. Indeed, according to official reports,  
282 the incidence of malaria in Burkina Faso (cases per 1000 population at risk) increased from 366.1 in  
283 2019 to 389.9 in 2020<sup>12</sup>. Of the 7 SARS-CoV-2 seropositive/PCR positive samples, none of them were  
284 co-infected with malaria. Whereas of the 17 seronegative/PCR positive samples, two co-infections with  
285 malaria were reported (**Table 1, Figure 1B**). Finally, of the remaining 25 seropositive/PCR negative  
286 subjects, 8 were positive for malaria (**Table 1, Figure 1B**). Since the serology test measures total  
287 antibodies (IgG/A/M) for SARS-CoV-2, it cannot differentiate recent or past infections, therefore, we  
288 cannot rule out whether these data correspond to a co-infection or a sequential infection.

289 To summarize, we found 2 cases of confirmed SARS-CoV-2 (PCR positive) co-infection with malaria  
290 and 8 cases of suspected co-infection (seropositive/PCR negative). Of them, eight were children and  
291 teenagers below 14 years and two were adults of >40 years (**Table 1**). There were no significant  
292 differences in coinfection frequency between females and males (6 males, 4 females). Only one of the  
293 two PCR positive co-infected samples was suitable for sequencing (Ct < 35) and the lineage was A.21.

294 Similar low frequency for SARS-CoV-2 and malaria co-infections found in our study (1%) has been  
295 also reported in other studies (34–38) (**Supplementary Table 4**). A systematic review of COVID-19  
296 and malaria coinfection studies has estimated 11% of pooled prevalence (data of 5 studies) with a high  
297 degree of heterogeneity (39). However, it is important to note that these studies examined symptomatic  
298 patients at the hospital and our study tested stratified asymptomatic people randomly. A recent study  
299 reported a higher prevalence of co-infection (12%) with highest prevalence in the age group of 0–20  
300 years (22%) and above 60 years (20%), in this case malaria infection was evaluated in a cohort of  
301 hospitalized patients in Uganda with SARS-CoV-2 PCR-confirmed infection (40). As for the  
302 symptomatology of co-infections, preliminary data suggest that patients with SARS-CoV-2 and  
303 malaria did not seem to have a worst disease outcome but previous malaria exposure seems to be related  
304 to less frequency of severe COVID-19 (40). Another study reports that patients co-infected with  
305 malaria had significantly faster recovery compared to those not co-infected (38). One limitation of our  
306 study to analyze and draw conclusions about clinical outcomes of the co-infections is that all volunteers  
307 were asymptomatic. In addition, the low frequency of SARS-CoV-2 and malaria parasite single  
308 infections in the population (the small sample size of volunteers that were positive for either disease),  
309 reduces the probability of find them together.

310 It has been suggested that the low incidence and mortality of COVID-19 in malaria endemic regions  
311 could be related to cross-immunity and common immunodominant epitopes between malaria and  
312 SARS-CoV-2 (40–43). In-silico analysis have identified potential shared targets for immune response  
313 between SARS-CoV-2 and *Plasmodium falciparum* proteins which could generate cross-reactivity  
314 through HLA and CD8+ T-cell activation (42). Moreover, tuberculosis and malaria prevalence had  
315 been significantly associated with reduced COVID-19 mortality (43). Previous studies have also  
316 indicated that malaria-induced immunomodulation could be protective against respiratory viruses,  
317 reducing pulmonary inflammatory response inflammation (44,45). Alternatively, the higher burden of  
318 infectious diseases in sub-Saharan Africa has been suggested to mediate the asymptomatic SARS-  
319 CoV-2 infections by induction of immunological tolerance or trained immunity to other infections such  
320 as tuberculosis, other human coronaviruses and even Bacillus Calmette-Guérin (BCG) vaccination  
321 (19,43). In addition, other studies have reported that bacterial, fungal and viral co-infections with  
322 SARS-CoV-2 are also uncommon, however when present, they may cause a worse outcome (46–48).  
323 In the case of coinfections with HIV, the prevalence seems higher (26,6%) and HIV subjects showed

---

<sup>12</sup> <https://data.worldbank.org/indicator/SH.MLR.INCD.P3?locations=BF>



324 an increased risk of hospital admission for COVID-19 (49). However, the studies are still preliminary  
325 and further research is needed to test these hypotheses. Therefore, additional prospective studies are  
326 required to establish a cause-effect relationship between the SARS-CoV-2 disease outcome and co-  
327 infection with other circulating pathogens. These should include more patients, control groups, clinical  
328 and immunological information, tracing on SARS-CoV-2 severity when co-occurrence with other  
329 prevalent infectious diseases.

#### 330 **4 Conclusions**

331 To our knowledge, this is the first population-based SARS-CoV-2 prevalence study performed in  
332 Burkina-Faso during the first wave of the COVID-19 pandemic. In addition, this is also one of the few  
333 studies that examines the co-occurrence of SARS-CoV-2 infection with the malaria parasite in an  
334 asymptomatic population.

335 The findings from this seroprevalence study for SARS-CoV-2 indicate that the prevalence of antibodies  
336 against the new coronavirus was around 3% in Burkina Faso at the time of analysis, with large  
337 differences in prevalence at local level and between various age classes. This supports the hypothesis  
338 that Africa had one of the lowest coronavirus case rates and that would not be due, at least entirely, to  
339 a lower testing capacity. Another important finding of our study is the low frequency of co-infection  
340 with malaria among the sampled population (1.0%). Of these, 8 out of the 10 cases reported were in  
341 children (4) or teenagers (4), and 2 cases in adults of >40 years.

342 Finally, the whole genome sequencing analysis revealed that the circulating lineages found in Burkina  
343 Faso during the first wave of the pandemic were early clades derived from the Wuhan strain. Most of  
344 the lineages reported have been previously described in Burkina Faso or the neighbour countries.  
345 However, we also identified two less frequent lineages that were probably imported to Burkina-Faso  
346 from USA or Europe. We believe that data presented in this study help to fill the gap of the SARS-  
347 CoV-2 epidemiological situation in sub-Saharan Africa, where interactions with endemic infectious  
348 diseases are common.

#### 349 **5 Conflict of Interest**

350 *The authors declare that the research was conducted in the absence of any commercial or financial*  
351 *relationships that could be construed as a potential conflict of interest.*

#### 352 **6 Author Contributions**

353 Conceptualization was the responsibility of EG-D that also supervised the project with NI . RSY and  
354 JBO provided infrastructure and organized fieldwork activities in Burkina Faso. SRY, DMSS, AFY  
355 performed data collection. DL-F and MP-M performed RT-qPCR assays. IC, IG-M and MT-P  
356 conducted whole genome sequencing and phylogenetic analysis. DL-F and EG-D analysed the data  
357 and wrote the manuscript. NI, SRY and IC reviewed the manuscript. All authors read and approved the  
358 final manuscript.

#### 359 **7 Funding**

360 This research work received funding from by the European Commission–NextGenerationEU  
361 (Regulation EU 2020/2094) and grant: 202020E159, through CSIC’s Global Health Platform (PTI  
362 Salud Global).

## 363 **8 Acknowledgments**

364 We would like to thank all volunteers who participated in this study, as well as the local authorities  
365 and communities in Burkina Faso for their support. We also thank the IPBLN, IRSS and IBV core  
366 facilities for their support to project activities.

## 367 **9 References**

- 368 1. Wilkinson E, Giovanetti M, Tegally H, San JE, Lessells R, Cuadros D, et al. A year of genomic  
369 surveillance reveals how the SARS-CoV-2 pandemic unfolded in Africa. *Science* (80- ).  
370 2021;374(6566):423–31.
- 371 2. Kannan S, Shaik Syed Ali P, Sheeza A. Omicron (B.1.1.529) - variant of concern - molecular  
372 profile and epidemiology: A mini review. *Eur Rev Med Pharmacol Sci*. 2021;25(24):8019–22.
- 373 3. Tegally H, Wilkinson E, Lessells RJ, Giandhari J, Pillay S, Msomi N, et al. Sixteen novel  
374 lineages of SARS-CoV-2 in South Africa. *Nat Med* [Internet]. 2021;27(3):440–6. Available  
375 from: <http://dx.doi.org/10.1038/s41591-021-01255-3>
- 376 4. Khare S, Gurry C, Freitas L, Schultz MB, Bach G, Diallo A, et al. GISAID’s Role in Pandemic  
377 Response. *China CDC Wkly* [Internet]. 2021 Dec 12 [cited 2022 Sep 16];3(49):1049. Available  
378 from: [/pmc/articles/PMC8668406/](https://pubmed.ncbi.nlm.nih.gov/38668406/)
- 379 5. Hogan AB, Jewell BL, Sherrard-Smith E, Vesga JF, Watson OJ, Whittaker C, et al. Potential  
380 impact of the COVID-19 pandemic on HIV, tuberculosis, and malaria in low-income and  
381 middle-income countries: a modelling study. *Lancet Glob Heal*. 2020 Sep 1;8(9):e1132–41.
- 382 6. Sherrard-Smith E, Hogan AB, Hamlet A, Watson OJ, Whittaker C, Winskill P, et al. The  
383 potential public health consequences of COVID-19 on malaria in Africa. *Nat Med* [Internet].  
384 2020;26(9):1411–6. Available from: <http://dx.doi.org/10.1038/s41591-020-1025-y>
- 385 7. Grubaugh ND, Gangavarapu K, Quick J, Matteson NL, De Jesus JG, Main BJ, et al. An  
386 amplicon-based sequencing framework for accurately measuring intrahost virus diversity using  
387 PrimalSeq and iVar. *Genome Biol* [Internet]. 2019 Jan 8 [cited 2022 Sep 16];20(1):1–19.  
388 Available from: [https://genomebiology.biomedcentral.com/articles/10.1186/s13059-018-1618-](https://genomebiology.biomedcentral.com/articles/10.1186/s13059-018-1618-7)  
389 [7](https://genomebiology.biomedcentral.com/articles/10.1186/s13059-018-1618-7)
- 390 8. Wood DE, Salzberg SL. Kraken: Ultrafast metagenomic sequence classification using exact  
391 alignments. *Genome Biol* [Internet]. 2014 Mar 3 [cited 2022 Sep 16];15(3):1–12. Available  
392 from: <https://genomebiology.biomedcentral.com/articles/10.1186/gb-2014-15-3-r46>
- 393 9. Chen S, Zhou Y, Chen Y, Gu J. fastp: an ultra-fast all-in-one FASTQ preprocessor.  
394 *Bioinformatics* [Internet]. 2018 Sep 9 [cited 2022 Sep 16];34(17):i884. Available from:  
395 [/pmc/articles/PMC6129281/](https://pubmed.ncbi.nlm.nih.gov/3122281/)
- 396 10. Ewels P, Magnusson M, Lundin S, Källner M. MultiQC: summarize analysis results for multiple  
397 tools and samples in a single report. *Bioinformatics* [Internet]. 2016 Oct 1 [cited 2022 Sep  
398 16];32(19):3047–8. Available from:  
399 <https://academic.oup.com/bioinformatics/article/32/19/3047/2196507>

- 400 11. Wu F, Zhao S, Yu B, Chen YM, Wang W, Song ZG, et al. A new coronavirus associated with  
401 human respiratory disease in China. *Nat* 2020 5797798 [Internet]. 2020 Feb 3 [cited 2022 Sep  
402 16];579(7798):265–9. Available from: <https://www.nature.com/articles/s41586-020-2008-3>
- 403 12. Katoh K, Standley DM. MAFFT Multiple Sequence Alignment Software Version 7:  
404 Improvements in Performance and Usability. *Mol Biol Evol* [Internet]. 2013 Apr 1 [cited 2022  
405 Sep 16];30(4):772–80. Available from:  
406 <https://academic.oup.com/mbe/article/30/4/772/1073398>
- 407 13. O’Toole Á, Scher E, Underwood A, Jackson B, Hill V, McCrone JT, et al. Assignment of  
408 epidemiological lineages in an emerging pandemic using the pangolin tool. *Virus Evol*  
409 [Internet]. 2021 [cited 2022 Sep 16];7(2). Available from: </pmc/articles/PMC8344591/>
- 410 14. Aksamentov I, Roemer C, Hodcroft EB, Neher RA. Nextclade: clade assignment, mutation  
411 calling and quality control for viral genomes. *J Open Source Softw* [Internet]. 2021 Nov 30  
412 [cited 2022 Sep 16];6(67):3773. Available from:  
413 <https://joss.theoj.org/papers/10.21105/joss.03773>
- 414 15. Hadfield J, Megill C, Bell SM, Huddleston J, Potter B, Callender C, et al. NextStrain: Real-time  
415 tracking of pathogen evolution. *Bioinformatics*. 2018 Dec 1;34(23):4121–3.
- 416 16. Sagulenko P, Puller V, Neher RA. TreeTime: Maximum-likelihood phylodynamic analysis.  
417 *Virus Evol* [Internet]. 2018 Jan 1 [cited 2022 Sep 16];4(1). Available from:  
418 </pmc/articles/PMC5758920/>
- 419 17. WHO. Malaria Microscopy Quality Assurance Manual. 2009;
- 420 18. Haider N, Osman AY, Gadzekpo A, Akipede GO, Asogun D, Ansumana R, et al. Lockdown  
421 measures in response to COVID-19 in nine sub-Saharan African countries. *BMJ Glob Heal*.  
422 2020;5(10):1–10.
- 423 19. Kusi KA, Frimpong A, Partey FD, Lamptey H, Amoah LE, Ofori MF. High infectious disease  
424 burden as a basis for the observed high frequency of asymptomatic SARS-CoV-2 infections in  
425 sub-Saharan Africa. *AAS Open Res*. 2021;4(May):2.
- 426 20. Wu X, Fu B, Chen L, Feng Y. Serological tests facilitate identification of asymptomatic SARS-  
427 CoV-2 infection in Wuhan, China. *J Med Virol* [Internet]. 2020 Oct 1 [cited 2022 Sep  
428 16];92(10):1795–6. Available from: <https://pubmed.ncbi.nlm.nih.gov/32311142/>
- 429 21. Uyoga S, Adetifa IMO, Karanja HK, Nyagwange J, Tuju J, Wanjiku P, et al. Seroprevalence of  
430 anti-SARS-CoV-2 IgG antibodies in Kenyan blood donors. *Science* (80- ). 2021;371(6524):79–  
431 82.
- 432 22. Tadesse EB, Endris AA, Solomon H, Alayu M, Kebede A, Eshetu K, et al. Seroprevalence and  
433 risk factors for SARS-CoV-2 Infection in selected urban areas in Ethiopia: a cross-sectional  
434 evaluation during July 2020. *Int J Infect Dis* [Internet]. 2021;111:179–85. Available from:  
435 <https://doi.org/10.1016/j.ijid.2021.08.028>
- 436 23. Barrie MB, Lakoh S, Kelly JD, Kanu JS, Squire JS, Koroma Z, et al. SARS-CoV-2 antibody  
437 prevalence in Sierra Leone, March 2021: a cross-sectional, nationally representative, age-

- 438 stratified serosurvey. *BMJ Glob Heal* [Internet]. 2021;6:7271. Available from:  
439 <http://gh.bmj.com/>
- 440 24. Abdella S, Riou S, Tessema M, Assefa A, Seifu A, Blachman A, et al. Prevalence of SARS-  
441 CoV-2 in urban and rural Ethiopia: Randomized household serosurveys reveal level of spread  
442 during the first wave of the pandemic. *EClinicalMedicine* [Internet]. 2021 May 1 [cited 2022  
443 Jul 5];35. Available from: <https://pubmed.ncbi.nlm.nih.gov/34124630/>
- 444 25. Wiens KE, Mawien PN, Rumunu J, Slater D, Jones FK, Moheed S, et al. Seroprevalence of  
445 severe acute respiratory syndrome coronavirus 2 IgG in Juba, South Sudan, 2020. *Emerg Infect  
446 Dis*. 2021;27(6):1598–606.
- 447 26. Mulenga LB, Hines JZ, Fwoloshi S, Chirwa L, Siwingwa M, Yingst S, et al. Prevalence of  
448 SARS-CoV-2 in six districts in Zambia in July, 2020: a cross-sectional cluster sample survey.  
449 *Lancet Glob Heal* [Internet]. 2021;9(6):e773–81. Available from:  
450 [http://dx.doi.org/10.1016/S2214-109X\(21\)00053-X](http://dx.doi.org/10.1016/S2214-109X(21)00053-X)
- 451 27. Kempen JH, Abashawl A, Suga HK, Difabachew MN, Kempen CJ, Debele MT, et al. SARS-  
452 CoV-2 serosurvey in Addis Ababa, Ethiopia. *Am J Trop Med Hyg*. 2020;103(5):2022–3.
- 453 28. Daniel EA, Esakialraj L BH, S A, Muthuramalingam K, Karunaianantham R, Karunakaran LP,  
454 et al. Pooled Testing Strategies for SARS-CoV-2 diagnosis: A comprehensive review. *Diagn  
455 Microbiol Infect Dis* [Internet]. 2021 Oct 1 [cited 2022 Sep 16];101(2). Available from:  
456 <https://pubmed.ncbi.nlm.nih.gov/34175613/>
- 457 29. de Salazar A, Aguilera A, Trastoy R, Fuentes A, Alados JC, Causse M, et al. Sample pooling  
458 for SARS-CoV-2 RT-PCR screening. *Clin Microbiol Infect* [Internet]. 2020 Dec 1 [cited 2022  
459 Sep 16];26(12):1687.e1-1687.e5. Available from: <https://pubmed.ncbi.nlm.nih.gov/32919074/>
- 460 30. Alm E, Broberg EK, Connor T, Hodcroft EB, Komissarov AB, Maurer-Stroh S, et al.  
461 Geographical and temporal distribution of SARS-CoV-2 clades in the WHO European Region,  
462 January to June 2020. *Eurosurveillance* [Internet]. 2020 Aug 13 [cited 2022 Sep  
463 14];25(32):2001410. Available from: [https://www.eurosurveillance.org/content/10.2807/1560-  
464 7917.ES.2020.25.32.2001410](https://www.eurosurveillance.org/content/10.2807/1560-7917.ES.2020.25.32.2001410)
- 465 31. Ngoi JM, Quashie PK, Morang’a CM, Bonney JHK, Amuzu DSY, Kumordjie S, et al. Genomic  
466 analysis of SARS-CoV-2 reveals local viral evolution in Ghana. *Exp Biol Med*.  
467 2021;246(8):960–70.
- 468 32. Korber B, Fischer WM, Gnanakaran S, Yoon H, Theiler J, Abfalterer W, et al. Tracking Changes  
469 in SARS-CoV-2 Spike: Evidence that D614G Increases Infectivity of the COVID-19 Virus.  
470 *Cell*. 2020 Aug 20;182(4):812-827.e19.
- 471 33. Sallam M, Ababneh NA, Dababseh D, Bakri FG, Mahafzah A. Temporal increase in D614G  
472 mutation of SARS-CoV-2 in the Middle East and North Africa. *Heliyon*. 2021 Jan  
473 1;7(1):e06035.
- 474 34. Bakamutumaho B, Cummings MJ, Owor N, Kayiwa J, Namulondo J, Byaruhanga T, et al.  
475 Severe COVID-19 in Uganda across two epidemic phases: A prospective cohort study. *Am J  
476 Trop Med Hyg*. 2021;105(3):740–4.

- 477 35. Morton B, Barnes KG, Anscombe C, Jere K, Matambo P, Mandolo J, et al. Distinct clinical and  
478 immunological profiles of patients with evidence of SARS-CoV-2 infection in sub-Saharan  
479 Africa. *Nat Commun.* 2021;12(1).
- 480 36. Matangila JR, Nyembu RK, Telo GM, Ngoy CD, Sakobo TM, Massolo JM, et al. Clinical  
481 characteristics of COVID-19 patients hospitalized at Clinique Ngaliema, a public hospital in  
482 Kinshasa, in the Democratic Republic of Congo: A retrospective cohort study. *PLoS One*  
483 [Internet]. 2020;15(12 December):1–15. Available from:  
484 <http://dx.doi.org/10.1371/journal.pone.0244272>
- 485 37. Amoo OS, Aina OO, Okwurawe AP, Onwuamah CK, Shaibu JO, Ige F, et al. COVID-19  
486 Spread Patterns Is Unrelated to Malaria Co-Infections in Lagos, Nigeria. *Adv Infect Dis.*  
487 2020;10(05):200–15.
- 488 38. Mahajan NN, Gajbhiye RK, Bahirat S, Lokhande PD, Mathe A, Rathi S, et al. Co-infection of  
489 malaria and early clearance of SARS-CoV-2 in healthcare workers. *J Med Virol.*  
490 2021;93(4):2431–8.
- 491 39. Wilairatana P, Masangkay FR, Kotepui KU, Milanez GDJ, Kotepui M. Prevalence and  
492 characteristics of malaria among covid-19 individuals: A systematic review, meta-analysis, and  
493 analysis of case reports. *PLoS Negl Trop Dis* [Internet]. 2021;15(10):1–18. Available from:  
494 <http://dx.doi.org/10.1371/journal.pntd.0009766>
- 495 40. Achan J, Serwanga A, Wanzira H, Kyagulanyi T, Nuwa A, Magumba G, et al. Current malaria  
496 infection, previous malaria exposure, and clinical profiles and outcomes of COVID-19 in a  
497 setting of high malaria transmission: an exploratory cohort study in Uganda. *The Lancet*  
498 *Microbe* [Internet]. 2022;3(1):e62–71. Available from: [http://dx.doi.org/10.1016/S2666-5247\(21\)00240-8](http://dx.doi.org/10.1016/S2666-5247(21)00240-8)
- 500 41. Osei SA, Biney RP, Anning AS, Nortey LN, Ghartey-Kwansah G. Low incidence of COVID-  
501 19 case severity and mortality in Africa; Could malaria co-infection provide the missing link?  
502 *BMC Infect Dis* [Internet]. 2022;22(1):1–11. Available from: <https://doi.org/10.1186/s12879-022-07064-4>
- 504 42. Iesa MAM, Osman MEM, Hassan MA, Dirar AIA, Abuzeid N, Mancuso JJ, et al. SARS-CoV-  
505 2 and Plasmodium falciparum common immunodominant regions may explain low COVID-19  
506 incidence in the malaria-endemic belt. *New microbes new Infect* [Internet]. 2020 Nov 1 [cited  
507 2022 Jul 7];38. Available from: <https://pubmed.ncbi.nlm.nih.gov/33230417/>
- 508 43. Raham TF. Influence of malaria endemicity and tuberculosis prevalence on COVID-19  
509 mortality. *Public Health* [Internet]. 2021;194:33–5. Available from:  
510 <https://doi.org/10.1016/j.puhe.2021.02.018>
- 511 44. Edwards CL, Zhang V, Werder RB, Best SE, Sebina I, James KR, et al. Coinfection with Blood-  
512 Stage Plasmodium Promotes Systemic Type I Interferon Production during Pneumovirus  
513 Infection but Impairs Inflammation and Viral Control in the Lung. *Clin Vaccine Immunol*  
514 [Internet]. 2015 May 1 [cited 2022 Jul 7];22(5):477–83. Available from:  
515 <https://pubmed.ncbi.nlm.nih.gov/25716232/>
- 516 45. Thompson MG, Breiman RF, Hamel MJ, Desai M, Emukule G, Khagayi S, et al. Influenza and

517 malaria coinfection among young children in western Kenya, 2009-2011. *J Infect Dis* [Internet].  
518 2012 Dec 1 [cited 2022 Jul 7];206(11):1674–84. Available from:  
519 <https://pubmed.ncbi.nlm.nih.gov/22984118/>

520 46. Garcia-Vidal C, Sanjuan G, Moreno-García E, Puerta-Alcalde P, Garcia-Pouton N, Chumbita  
521 M, et al. Incidence of co-infections and superinfections in hospitalized patients with COVID-  
522 19: a retrospective cohort study. *Clin Microbiol Infect* [Internet]. 2021 Jan 1 [cited 2022 Jul  
523 4];27(1):83–8. Available from: <https://pubmed.ncbi.nlm.nih.gov/32745596/>

524 47. Musuuza JS, Watson L, Parmasad V, Putman-Buehler N, Christensen L, Safdar N. Prevalence  
525 and outcomes of co-infection and superinfection with SARS-CoV-2 and other pathogens: A  
526 systematic review and metaanalysis. *PLoS One*. 2021 May 1;16(5 May).

527 48. Feldman C, Anderson R. The role of co-infections and secondary infections in patients with  
528 COVID-19. *Pneumonia* [Internet]. 2021 [cited 2022 Jul 7]; Available from:  
529 <https://doi.org/10.1186/s41479-021-00083-w>

530 49. Danwang C, Noubiap JJ, Robert A, Yombi JC. Outcomes of patients with HIV and COVID-19  
531 co-infection: a systematic review and meta-analysis. *AIDS Res Ther*. 2022 Dec 1;19(1).

532

## 533 **10 Supplementary Material**

534 Supplementary figures 1 to 3.

535 Supplementary tables 1 to 4

536 Supplementary references

## 537 **11 Data Availability Statement**

538 The datasets generated for this study can be found in the European Nucleotide Archive (ENA) database  
539 (<https://www.ebi.ac.uk/ena/browser/home>) with project ID PRJEB55393 and sample IDs  
540 SAMEA110648965-SAMEA110648977.

541

## 542 **Figure captions**

543 **Figure 1. (A)** Prevalence of SARS-CoV-2, malaria and co-infection by age group. **(B)** Venn diagram  
544 representation of positive cases.

545 **Figure 2.** Phylogenetic tree with the 13 new SARS-CoV-2 Burkina Faso genomes placed on a  
546 reference tree of 2022 published sequences from all over the world along with the diversity panel  
547 below, a bar-chart showing the variation (i.e. mutations) of the 13 sequences in the genome relative to  
548 the reference sequence Wuhan-Hu-1/2019 (MN908947). Phylogenetic tree generated with Nextclade  
549 online software v2.5.0 (<https://clades.nextstrain.org>) (accessed on 13 September 2022) and visualized  
550 using Auspice v2.37.3 (<https://auspice.us/>) (accessed on 13 September 2022).

551

552 **Table 1.** Distribution of positive cases by age classes and gender

## SARS-CoV-2 and malaria co-infection Burkina

| Age group    | Sex | non-infected | COVID-19 IgG/A/M | malaria    | COVID-19 Ig & malaria | SARS-CoV-2 PCR | SARS-CoV-2 PCR & COVID-19 Ig | SARS-CoV-2 PCR & malaria | Total      |
|--------------|-----|--------------|------------------|------------|-----------------------|----------------|------------------------------|--------------------------|------------|
| A 5-12       | F   | 75           | 0                | 46         | 0                     | 0              | 0                            | 0                        | 121        |
| A 5-12       | M   | 67           | 6                | 60         | 3                     | 1              | 0                            | 1                        | 130        |
| B 13-20      | F   | 84           | 6                | 34         | 2                     | 0              | 0                            | 0                        | 122        |
| B 13-20      | M   | 82           | 1                | 43         | 1                     | 3              | 0                            | 1                        | 127        |
| C 21-40      | F   | 150          | 1                | 11         | 0                     | 4              | 0                            | 0                        | 166        |
| C 21-40      | M   | 79           | 1                | 4          | 0                     | 1              | 0                            | 0                        | 85         |
| D >40        | F   | 116          | 10               | 14         | 2                     | 5              | 3                            | 0                        | 140        |
| D >40        | M   | 87           | 7                | 7          | 0                     | 10             | 4                            | 0                        | 107        |
| Sub-total    | F   | 425          | 17               | 105        | 4                     | 9              | 3                            | 0                        | 549        |
| Sub-total    | M   | 315          | 15               | 114        | 4                     | 15             | 4                            | 2                        | 449        |
| <b>Total</b> |     | <b>740</b>   | <b>32</b>        | <b>219</b> | <b>8</b>              | <b>24</b>      | <b>7</b>                     | <b>2</b>                 | <b>998</b> |

553

554 **Table 2.** Circulating lineages and clades of SARS-CoV-2 in Burkina Faso from August to November  
 555 2020. Mutations (aminoacid substitutions) relative to the reference sequence Wuhan-Hu-1/2019  
 556 (MN908947) are showed.

| Sample Accession (ENA) | Sample Alias | Lineage (Pangolin) | Clade (Nextstrain) | Global mutations | Spike mutations     |
|------------------------|--------------|--------------------|--------------------|------------------|---------------------|
| SAMEA110648965         | BOB20        | A.21               | 19B                | 15               | D614N, V622F, Q675R |
| SAMEA110648966         | BOB49        | A.19               | 19B                | 11               | D614G               |
| SAMEA110648967         | BOB86        | A.19               | 19B                | 3                | D614G               |
| SAMEA110648968         | BOB108       | A.19               | 19B                | 7                | D614G               |
| SAMEA110648969         | BOB113       | B.1.1.404          | 20B                | 7                | D614G, G1219V       |
| SAMEA110648970         | BOB155       | A.21               | 19B                | 7                | -                   |
| SAMEA110648971         | BOB159       | B.1.1.404          | 20B                | 6                | D614G               |
| SAMEA110648972         | BOB216       | B.1.1.404          | 20B                | 7                | D614G               |
| SAMEA110648973         | BOB323       | B.1                | 20A                | 13               | D614G               |
| SAMEA110648974         | BOB327       | B.1.1.404          | 20B                | 8                | Y248S, D614G        |
| SAMEA110648975         | DAN86        | A.19               | 19B                | 7                | D614G               |
| SAMEA110648976         | KOK14        | B.1.1.118          | 20B                | 9                | D614G, S640F        |
| SAMEA110648977         | ZAN2         | A.21               | 19B                | 15               | D614N, V622F        |

557

558

A.

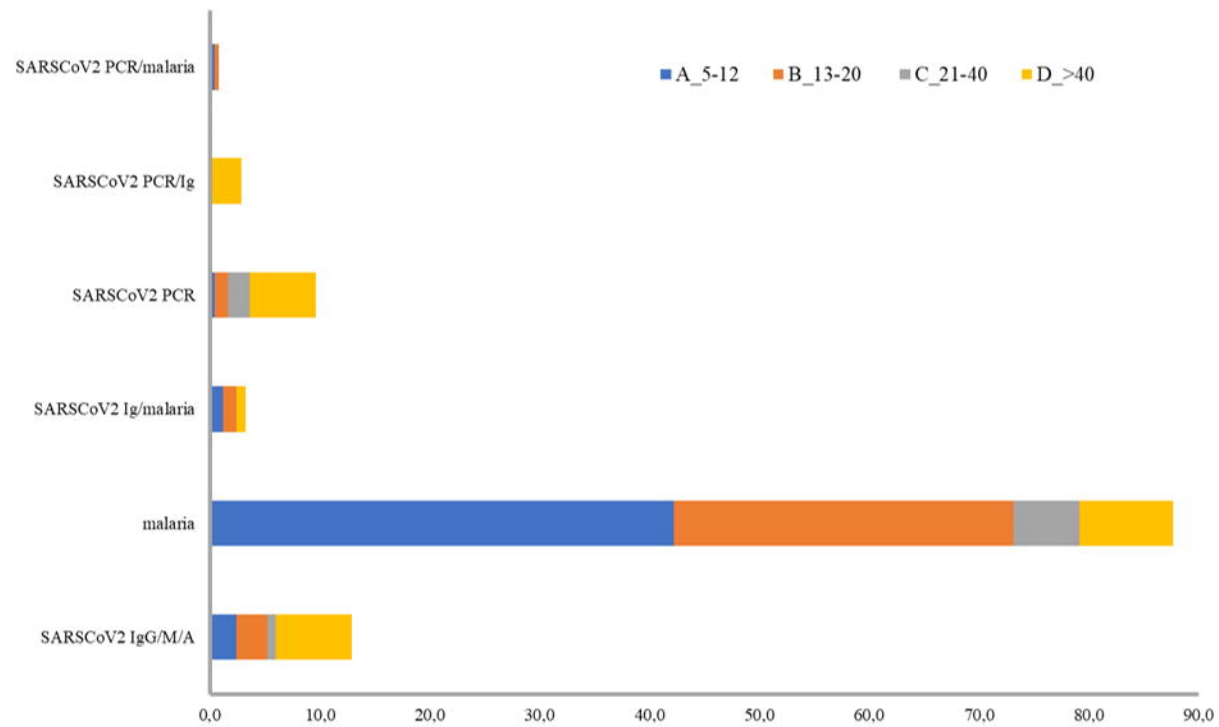

B.

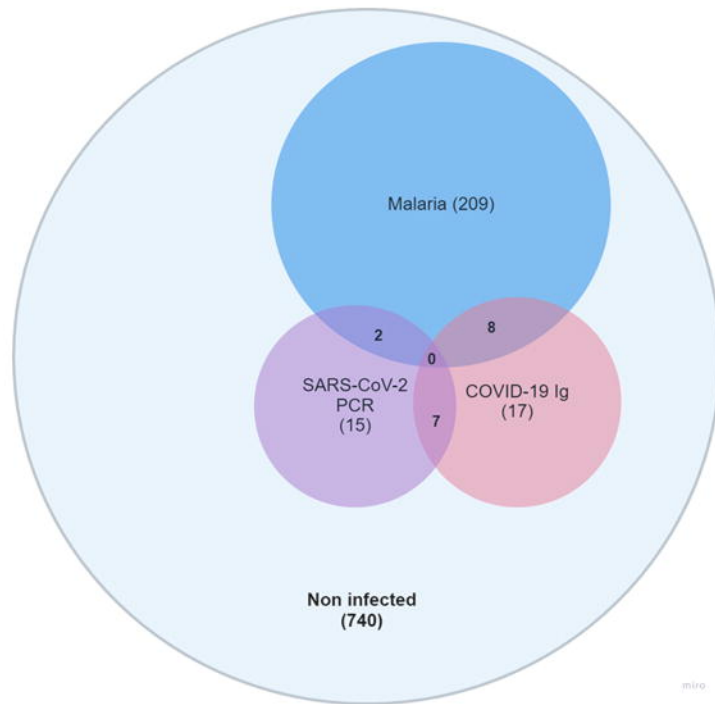



Nextclade Pango Lineage

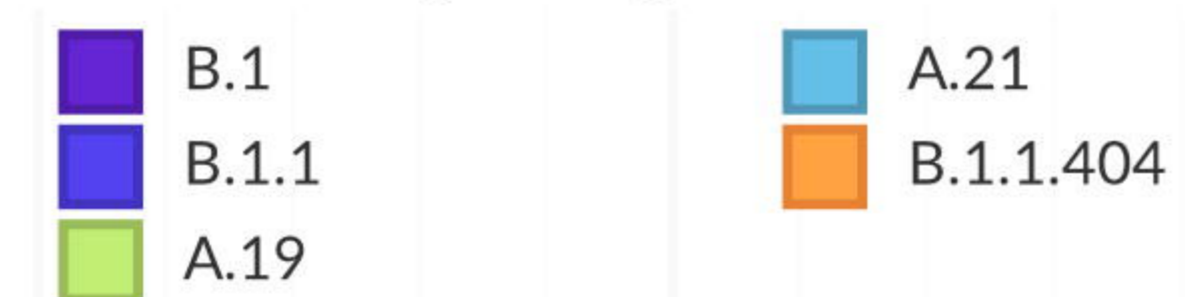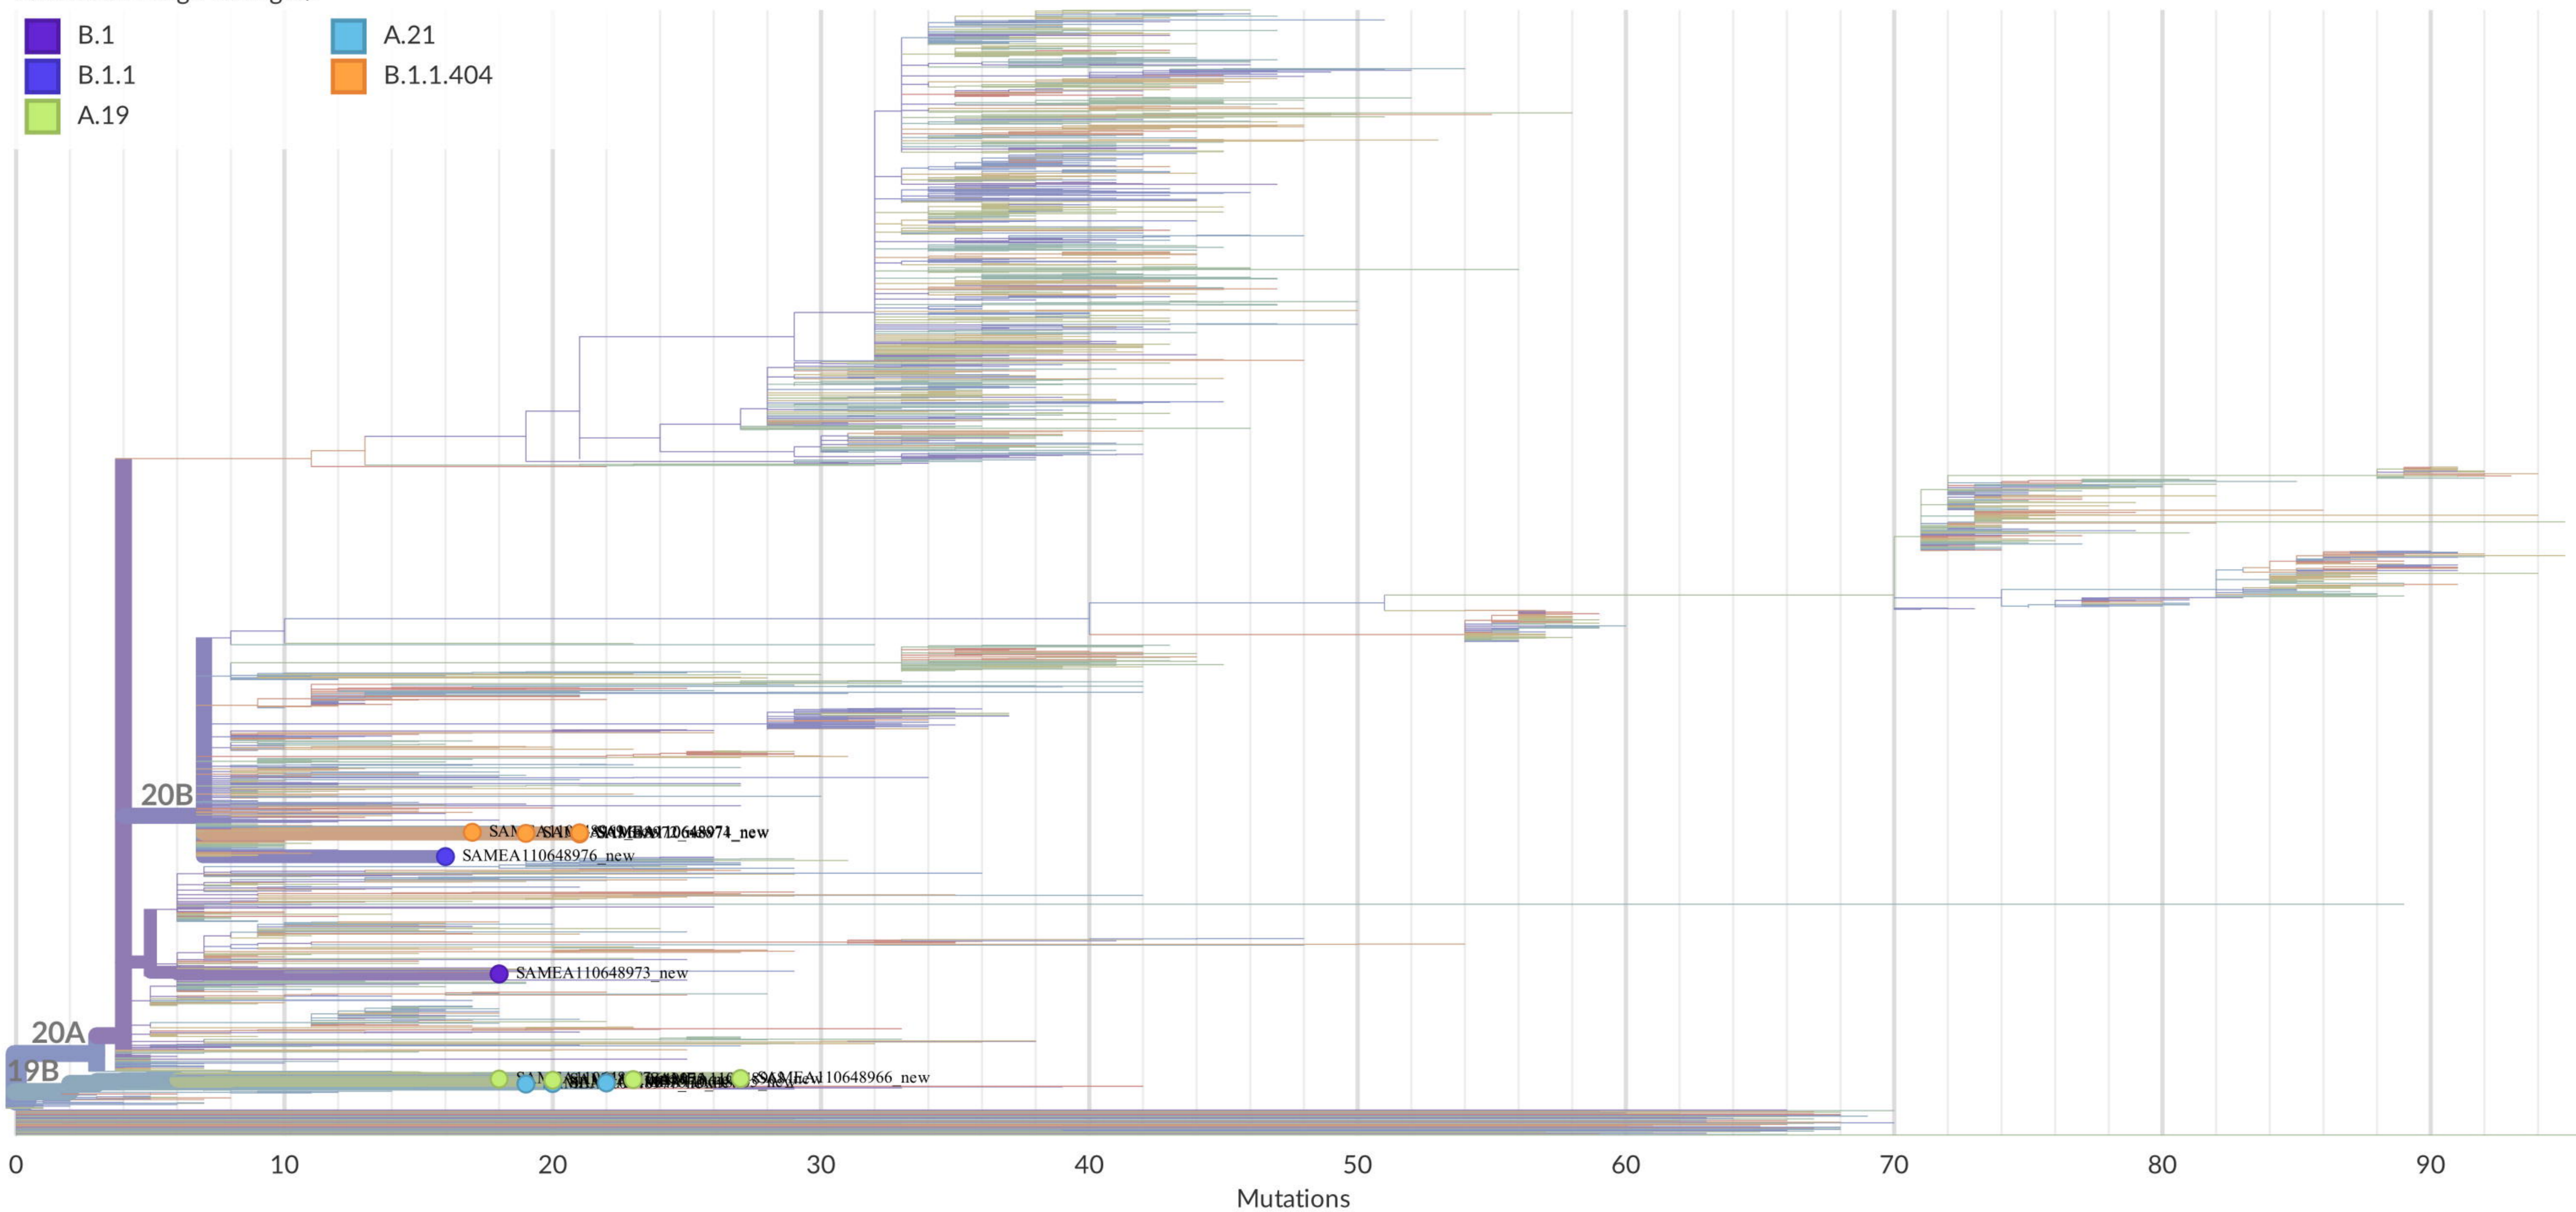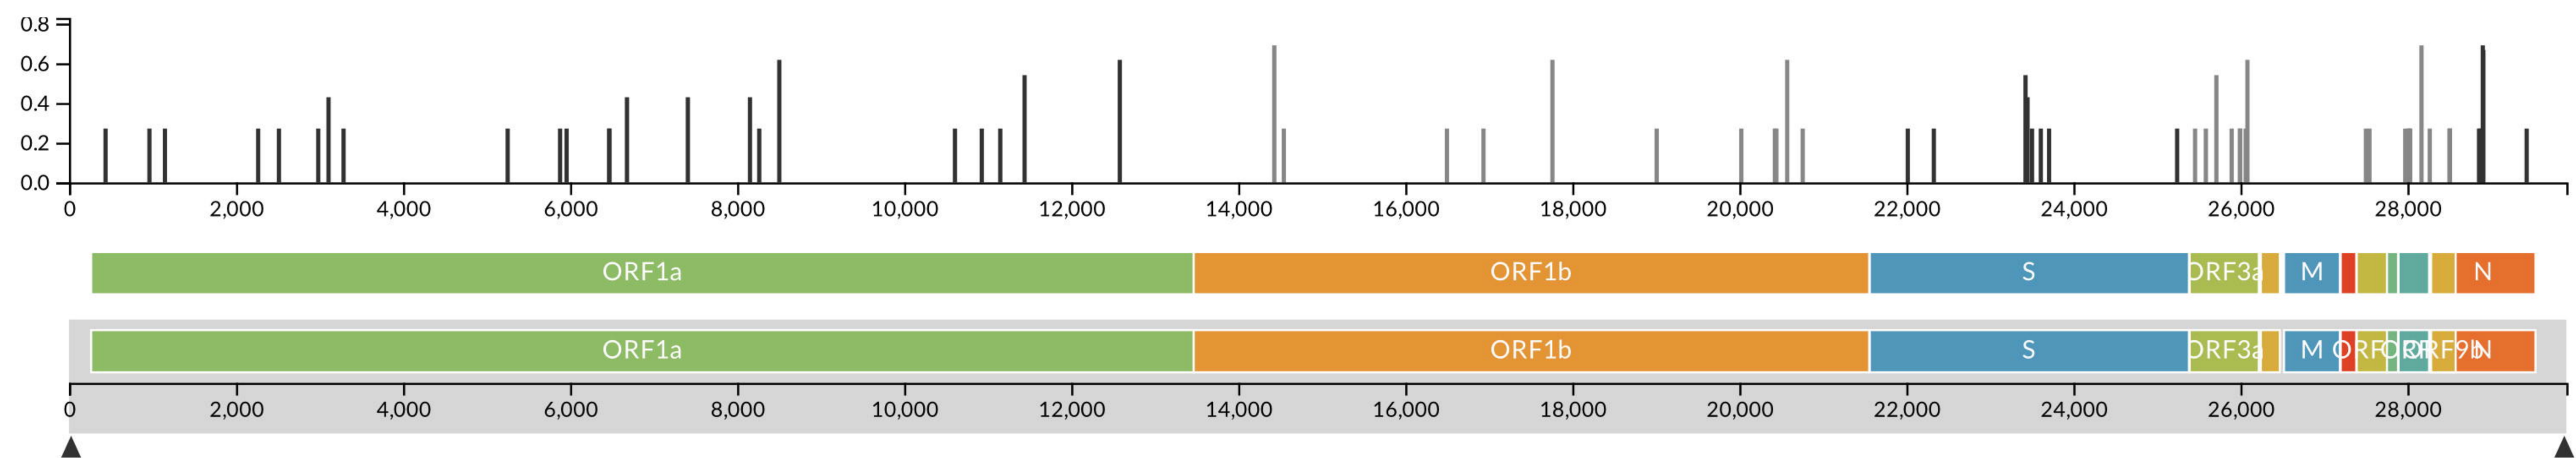

Source: https://medrxiv.org/content/10.1101/2022.09.20.22280138.full.pdf
